# Supplementary material
Source: PubMed Central journal article supplement (PMC4229071)
Supplement: NIHMS313033-supplement-Supp_Table_S1-S4.pdf [file NIHMS313033-supplement-Supp_Table_S1-S4.pdf]

# Histidine in Continuum Electrostatics Protonation State Calculations

## Supporting Information

Vernon Couch and Alexei Stuchebrukhov

Table S1: Hartree-Fock 6-31G(d) Mulliken charge distributions for the various charge states of methylimidazole. States are described according to the bound protons as  $(n^{\delta}, n^{\epsilon})$ . Derived charges determined from Eqn. (5).

| Atom Name    | (1,1)  | (1,0)  | (0,1)  | (0,0)  | (0,0)<br>derived | $\Delta$ | $\Delta^2$ |
|--------------|--------|--------|--------|--------|------------------|----------|------------|
| CB           | -0.526 | -0.517 | -0.503 | -0.493 | -0.495           | -0.002   | 0.000      |
| HB3          | 0.229  | 0.178  | 0.181  | 0.123  | 0.131            | 0.008    | 0.000      |
| HB2          | 0.229  | 0.178  | 0.181  | 0.123  | 0.131            | 0.008    | 0.000      |
| HB1          | 0.235  | 0.193  | 0.160  | 0.115  | 0.118            | 0.003    | 0.000      |
| CG           | 0.278  | 0.269  | 0.183  | 0.175  | 0.175            | 0.000    | 0.000      |
| ND1          | -0.722 | -0.757 | -0.545 | -0.638 | -0.579           | 0.059    | 0.003      |
| HD1          | 0.462  | 0.394  | 0.000  | 0.000  | -0.068           | -0.068   | 0.005      |
| CD2          | -0.008 | -0.096 | -0.036 | -0.120 | -0.124           | -0.004   | 0.000      |
| HD2          | 0.306  | 0.194  | 0.214  | 0.081  | 0.102            | 0.021    | 0.000      |
| CE1          | 0.409  | 0.268  | 0.276  | 0.160  | 0.136            | -0.024   | 0.001      |
| HE1          | 0.329  | 0.208  | 0.210  | 0.077  | 0.090            | 0.013    | 0.000      |
| NE2          | -0.686 | -0.513 | -0.719 | -0.603 | -0.547           | 0.056    | 0.003      |
| HE2          | 0.467  | 0.000  | 0.397  | 0.000  | -0.070           | -0.070   | 0.005      |
| Total Charge | 1.000  | 0.000  | 0.000  | -1.000 | -1.000           | RMSD >   | 0.037      |

Table S2: CHARMM charge distributions for the various charge states of methylimidazole

| Atom Name    | (1,1) | (1,0) | (0,1) | (0,0)<br>derived |
|--------------|-------|-------|-------|------------------|
| N            | -0.47 | -0.47 | -0.47 | -0.47            |
| H            | 0.31  | 0.31  | 0.31  | 0.31             |
| CA           | 0.07  | 0.07  | 0.07  | 0.07             |
| HA           | 0.09  | 0.09  | 0.09  | 0.09             |
| C            | 0.51  | 0.51  | 0.51  | 0.51             |
| O            | -0.51 | -0.51 | -0.51 | -0.51            |
| CB           | -0.05 | -0.09 | -0.08 | -0.12            |
| HB3          | 0.09  | 0.09  | 0.09  | 0.09             |
| HB2          | 0.09  | 0.09  | 0.09  | 0.09             |
| CG           | 0.19  | -0.05 | 0.22  | -0.02            |
| ND1          | -0.51 | -0.36 | -0.70 | -0.55            |
| HD1          | 0.44  | 0.32  | 0.00  | -0.12            |
| CD2          | 0.19  | 0.22  | -0.05 | -0.02            |
| HD2          | 0.13  | 0.10  | 0.09  | 0.06             |
| CE1          | 0.32  | 0.25  | 0.25  | 0.18             |
| HE1          | 0.18  | 0.13  | 0.13  | 0.08             |
| NE2          | -0.51 | -0.70 | -0.36 | -0.55            |
| HE2          | 0.44  | 0.00  | 0.32  | -0.12            |
| Total Charge | 1.00  | 0.00  | 0.00  | -1.00            |

Table S3: AMBER charge distributions for the various charge states of methylimidazole.

| Atom Name    | (1,1) | (1,0) | (0,1) | (0,0)<br>derived |
|--------------|-------|-------|-------|------------------|
| N            | -0.35 | -0.42 | -0.42 | -0.48            |
| H            | 0.27  | 0.27  | 0.27  | 0.27             |
| CA           | -0.14 | 0.02  | -0.06 | 0.10             |
| HA           | 0.12  | 0.09  | 0.14  | 0.10             |
| C            | 0.73  | 0.60  | 0.60  | 0.46             |
| O            | -0.59 | -0.57 | -0.57 | -0.55            |
| CB           | -0.04 | -0.05 | -0.01 | -0.01            |
| HB3          | 0.08  | 0.04  | 0.04  | 0.00             |
| HB2          | 0.08  | 0.04  | 0.04  | 0.00             |
| CG           | 0.00  | -0.03 | 0.19  | 0.16             |
| ND1          | -0.15 | -0.38 | -0.54 | -0.77            |
| HD1          | 0.39  | 0.36  | 0.00  | -0.02            |
| CD2          | -0.11 | 0.13  | -0.22 | 0.02             |
| HD2          | 0.23  | 0.11  | 0.19  | 0.07             |
| CE1          | -0.02 | 0.21  | 0.16  | 0.39             |
| HE1          | 0.27  | 0.14  | 0.14  | 0.01             |
| NE2          | -0.17 | -0.57 | -0.28 | -0.68            |
| HE2          | 0.39  | 0.00  | 0.33  | -0.06            |
| Total Charge | 1.00  | 0.00  | 0.00  | -1.00            |

Table S4: PARSE charge distributions for the various charge states of methylimidazole.

| Atom Name    | (1,1) | (1,0) | (0,1) | (0,0)<br>derived |
|--------------|-------|-------|-------|------------------|
| N            | -0.40 | -0.40 | -0.40 | -0.40            |
| H            | 0.40  | 0.40  | 0.40  | 0.40             |
| CA           | 0.00  | 0.00  | 0.00  | 0.00             |
| HA           | 0.00  | 0.00  | 0.00  | 0.00             |
| C            | 0.55  | 0.55  | 0.55  | 0.55             |
| O            | -0.55 | -0.55 | -0.55 | -0.55            |
| CB           | 0.13  | 0.13  | 0.13  | 0.13             |
| HB3          | 0.00  | 0.00  | 0.00  | 0.00             |
| HB2          | 0.00  | 0.00  | 0.00  | 0.00             |
| CG           | 0.14  | -0.13 | 0.16  | -0.11            |
| ND1          | -0.35 | -0.40 | -0.56 | -0.61            |
| HD1          | 0.45  | 0.40  | 0.00  | -0.05            |
| CD2          | 0.14  | 0.16  | -0.13 | -0.11            |
| HD2          | 0.13  | 0.13  | 0.13  | 0.13             |
| CE1          | 0.14  | 0.16  | 0.16  | 0.17             |
| HE1          | 0.13  | 0.13  | 0.13  | 0.13             |
| NE2          | -0.35 | -0.56 | -0.40 | -0.61            |
| HE2          | 0.45  | 0.00  | 0.40  | -0.05            |
| Total Charge | 1.00  | 0.00  | 0.00  | -1.00            |
